# Supplementary material
Source: publisher figshare collection journal article supplement (https://gsajournals.figshare.com/ndownloader/files/22768241)
Supplement: Supplementary file 1 [file 22768241]

## Sheet: Class Calculations
Class	White-to-Opaque Effect in Class	White-to-Opaque in Class	Opaque-to-White Effect in Class	Opaque-to-White in Class	White-to-Opaque Frequency In Class	Normalized White-to-Opaque Frequency In Class	White-to-Opaque Frequency In Class P-Value	Opaque-to-White Frequency In Class	Normalized Opaque-to-White Frequency In Class	Opaque-to-White Frequency In Class P-Value
All Genes In Library	23	172	11	170	13.3721	1	N/A	6.47059	1	N/A
hydrolase activity	5	41	3	41	12.1951	0.911983	0.205017	7.31707	1.13082	0.26334
transferase activity	6	36	0	34	16.6667	1.24638	0.165813	0	0	0.0789125
protein kinase activity	5	25	0	23	20	1.49565	0.132921	0	0	0.191664
protein binding	4	17	3	17	23.5294	1.75959	0.118131	17.6471	2.72727	0.0681428
transporter activity	1	17	2	17	5.88235	0.439898	0.224667	11.7647	1.81818	0.219571
phosphatase activity	3	16	1	16	18.75	1.40217	0.216805	6.25	0.965909	0.397811
lipid binding	2	12	0	12	16.6667	1.24638	0.292189	0	0	0.435652
oxidoreductase activity	1	12	0	12	8.33333	0.623188	0.335656	0	0	0.435652
enzyme regulator activity	4	11	2	11	36.3636	2.71937	0.0352431	18.1818	2.80992	0.126693
peptidase activity	1	9	0	9	11.1111	0.830918	0.390051	0	0	0.53944
membrane	7	41	1	41	17.0732	1.27678	0.143558	2.43902	0.37694	0.163406
cytoplasm	9	40	2	39	22.5	1.68261	0.0345394	5.12821	0.792541	0.283916
plasma membrane	7	38	1	38	18.4211	1.37757	0.118377	2.63158	0.406699	0.19219
nucleus	9	25	3	24	36	2.69217	0.00125548	12.5	1.93182	0.138188
extracellular region	1	23	3	23	4.34783	0.325142	0.119345	13.0435	2.01581	0.127873
endomembrane system	4	22	3	22	18.1818	1.35968	0.187085	13.6364	2.10744	0.117548
cell wall	0	20	4	20	0	0	0.0470392	20	3.09091	0.0230947
site of polarized growth	5	18	0	17	27.7778	2.07729	0.0521299	0	0	0.302233
cellular bud	3	16	0	15	18.75	1.40217	0.216805	0	0	0.350345
mitochondrion	1	10	0	10	10	0.747826	0.374896	0	0	0.502584
cell cortex	3	10	0	9	30	2.24348	0.103807	0	0	0.53944
She3 related	4	27	1	27	14.8148	1.10789	0.225793	3.7037	0.572391	0.312517
4-fold opaque enriched	1	19	1	19	5.26316	0.393593	0.184679	5.26316	0.813397	0.385693
2-fold opaque enriched	2	37	2	37	5.40541	0.40423	0.0636073	5.40541	0.835381	0.293728
4-fold white enriched	1	11	0	11	9.09091	0.679842	0.356382	0	0	0.468031
2-fold white enriched	3	24	1	24	12.5	0.934783	0.254409	4.16667	0.643939	0.344213
white-to-opaque 5-fold change	N/A	N/A	3	21	N/A	N/A	N/A	14.2857	2.20779	0.107279
opaque-to-white 5-fold change	3	11	N/A	N/A	27.2727	2.03953	0.125113	N/A	N/A	N/A
regulation of biological process	20	65	2	63	30.7692	2.301	2.59485e-07	3.1746	0.49062	0.113489
filamentous growth	13	52	3	51	25	1.86957	0.00340006	5.88235	0.909091	0.264695
response to chemical	9	45	2	43	20	1.49565	0.0633153	4.65116	0.718816	0.25937
response to stress	12	45	2	44	26.6667	1.9942	0.00295105	4.54545	0.702479	0.252465
cellular protein modification process	8	41	1	39	19.5122	1.45917	0.084155	2.5641	0.39627	0.182304
interspecies interaction between organisms	7	40	4	39	17.5	1.3087	0.135469	10.2564	1.58508	0.148771
pathogenesis	7	36	4	35	19.4444	1.45411	0.100672	11.4286	1.76623	0.117476
transport	3	35	3	35	8.57143	0.640994	0.156704	8.57143	1.32468	0.234951
signal transduction	11	33	0	33	33.3333	2.49275	0.000594906	0	0	0.0858017
cell wall organization	6	25	2	25	24	1.79478	0.0613481	8	1.23636	0.294703
response to drug	4	24	1	22	16.6667	1.24638	0.207077	4.54545	0.702479	0.363093
cell cycle	6	19	1	18	31.5789	2.36156	0.0192948	5.55556	0.858586	0.391125
biological_process	0	19	0	19	0	0	0.0553615	0	0	0.260204
organelle organization	6	18	1	18	33.3333	2.49275	0.0148399	5.55556	0.858586	0.391125
carbohydrate metabolic process	1	16	2	16	6.25	0.467391	0.246168	12.5	1.93182	0.205764
biofilm formation	0	16	4	16	0	0	0.0896371	25	3.86364	0.0104694
cellular homeostasis	1	15	2	15	6.66667	0.498551	0.268391	13.3333	2.06061	0.191142
lipid metabolic process	1	11	0	11	9.09091	0.679842	0.356382	0	0	0.468031
cytoskeleton organization	3	10	0	10	30	2.24348	0.103807	0	0	0.502584
conjugation	1	10	1	10	10	0.747826	0.374896	10	1.54545	0.368561
cell development	2	10	0	10	20	1.49565	0.263225	0	0	0.502584

## Sheet: Gene Class Lists
hydrolase activity	transferase activity	protein kinase activity	protein binding	transporter activity	phosphatase activity	lipid binding	oxidoreductase activity	enzyme regulator activity	peptidase activity	membrane	cytoplasm	plasma membrane	nucleus	extracellular region	endomembrane system	cell wall	site of polarized growth	cellular bud	mitochondrion	cell cortex	regulation of biological process	filamentous growth	response to chemical	response to stress	cellular protein modification process	interspecies interaction between organisms	pathogenesis	transport	signal transduction	cell wall organization	response to drug	cell cycle	biological_process	organelle organization	carbohydrate metabolic process	biofilm formation	cellular homeostasis	lipid metabolic process	cytoskeleton organization	conjugation	cell development	She3 related	4-fold Opaque Enriched	2-fold Opaque Enriched	4-fold White Enriched	2-fold White Enriched	White-to-Opaque 5-fold Change	Opaque-to-White 5-fold Change
RHB1	NPR1	NPR1	NMD5	NMD5	PTC1	GIN4	C2_06350C_A	CCN1	SAP3	NPR1	NPR1	NPR1	NMD5	PGA4	NPR1	PGA10	MSB2	HSL1	AOX1	PRK1	NPR1	RHB1	RHB1	RHB1	NPR1	IRE1	IRE1	NPR1	RHB1	RHB1	RHB1	RHB1	PGA55	DCK1	IRE1	PGA10	PGA10	MTS1	PRK1	STE3	PGA4	SHE3	PHO89	PHO89	CFL2	CFL2	C4_02720C_A	PCL5
IRE1	IRE1	IRE1	IRE1	GAP4	CPP1	PKH2	AOX1	FAR1	SAP8	AOX1	NMD5	RHB1	IRE1	MSB2	NMD5	PGA4	HSL1	GIN4	DCK1	HSL1	RHB1	DCK1	IRE1	IRE1	IRE1	MTS1	MTS1	NMD5	IRE1	IRE1	IRE1	OPY2	C1_05890W_A	PRK1	PGA4	ALS1	ALS1	GDE1	GIN4	CST20	RIM9	C7_03480W_A	OP4	OP4	MNN22	MNN22	PCL5	HWP1
SAP3	MTS1	PRK1	KIS1	ENA21	C4_00580W_A	RBT4	C6_03600C_A	GPA2	SAP7	RHB1	AOX1	OPY2	CST20	SAP3	IRE1	PGA13	CST20	RAX2	YHB1	CST20	IRE1	MTS1	OPY2	OPY2	PRK1	SAP3	SAP3	RHB1	OPY2	DCK1	PGA4	PGA4	C4_05580C_A	CST20	GDE1	PHR1	GPA2	SLD1	C2_08920W_A	HST7	CST20	C4_04860W_A	FGR2	FGR2	C4_02720C_A	C4_02720C_A	C3_00570C_A	ECE1
GDE1	PGA4	HSL1	ALS1	HSP30	INP51	RBE1	C5_00810C_A	RGA2	SAP9	IRE1	IRE1	DCK1	CCN1	HEX1	HST7	RAX2	FAR1	PHR1	PTC5	GIN4	OPY2	MSB2	PGA4	DCK1	HSL1	HSL1	HSL1	PGA10	DCK1	PGA4	GAP4	HSL1	C1_11430W_A	PTC1	HEX1	STE2	C1_09780C_A	INP51	C4_02720C_A	STE11	GPA2	PGA54	C1_05890W_A	C1_05890W_A	HGT6	HGT6	CTA9	CIP1
PTC1	PRK1	CST20	GPA2	PHO89	PTP3	RGD1	SLD1	PCL5	KEX2	OPY2	DCK1	MTS1	FAR1	SAP8	MNS1	SAP8	GIN4	RGA2	PTC2	RGA2	DCK1	PGA13	GAP4	MSB2	CST20	CST20	CST20	GAP4	MSB2	MSB2	HSL1	RIM9	OP4	GIN4	CHT2	CHK1	CTR2	STT4	RGA2	STE2	CAG1	C1_06140C_A	OPT4	OPT4	RBT5	RBT5	PKH2	PEP12
HEX1	HSL1	GIN4	STE11	CTR2	OCA6	C2_02440W_A	YHB1	RGD1	SAP6	DCK1	PRK1	PGA4	PTC1	OP4	KIS1	CHT2	RAX2	SSU81	PTC7	PKH2	MSB2	HSL1	HSL1	HSL1	PTC1	PTC1	PTC1	CST20	STE3	PGA13	GDE1	CST20	C5_03510C_A	C2_08920W_A	MNS1	RBT5	CCC1	FGR22	STT4	CAG1	CSK1	C1_11850W_A	SCW4	SCW4	HGT8	HGT8	C1_14200W_A	NMD5
CPP1	CST20	HST7	SSU81	C2_02570W_A	PHO15	C1_06320W_A	C1_09780C_A	KEX2	SAP5	MTS1	HSL1	MSB2	GIN4	CHT2	STE11	ALS1	HST7	SHE3	PDK2	C3_03680W_A	PGA13	RIM9	GDE1	C5_00810C_A	GIN4	SLD1	SLD1	ENA21	CST20	CST20	CCN1	CCN1	C4_04860W_A	CR_06450W_A	PHR1	CSA2	CFL2	FAD3	SIT4	IFF6	CEK1	C2_08290C_A	PRY1	PRY1	C6_02200C_A	C6_02200C_A	PRK1	CCN1
SAP8	GIN4	KIS1	CAG1	CCC1	PTC5	HET1	FET31	C1_04090C_A	RIM13	PGA4	CST20	GAP4	CPP1	PHR1	CCC1	PHR1	STE11	RGD1	LSC2	RGD1	SAP3	CST20	STE3	RIM9	CPP1	HEX1	HEX1	HSP30	FAR1	C2_08920W_A	GIN4	FAR1	SRD1	C4_02720C_A	GPA2	HWP1	RBT5	C3_03680W_A	BEM3	CEK1	RIM13	C1_05900W_A	C6_03600C_A	C6_03600C_A	PGA10	PGA10	PTC1	SPF1
C4_00580W_A	C4_00580W_A	STE11	HWP1	C6_01870C_A	PTC2	TUS1	FAD3	GAC1	SAP98	MSB2	FAR1	RIM9	HST7	SAP7	PTC7	CDC19	RGA2	MKC1	MKC1	BEM3	PRK1	CCN1	RIM9	CST20	HST7	CPP1	CPP1	YHB1	PTC1	HST7	HST7	GIN4	C1_05900W_A	RGA2	NAG1	PEP12	CSA2	C1_08860C_A	CLA4	CEK2	CLA4	C6_02200C_A	C4_05580C_A	C4_05580C_A	RBT4	RBT4	SSN3	PHO15
CHT2	HST7	SSN3	PEP12	HGT6	C7_00840C_A	BEM3	C5_04120C_A	BEM3		GAP4	PTC1	STE3	KIS1	PHO100	C1_14200W_A	SAP9	SSU81	TUS1	CTN1	C7_03480W_A	HSL1	PTC1	CST20	PTC1	MNS1	ALS1	ALS1	PHO89	GIN4	PHR1	KIS1	RAX2	C1_06660W_A	STT4	PHO15	YWP1	PEP12	LIP8	TSC11	CLA4	C1_03470C_A	PGA55	IFF6	IFF6	C2_08290C_A	C2_08290C_A	SIT4	CHT2
MNS1	KIS1	DUN1	C2_02440W_A	YEA4	PTC7	C7_03480W_A	CFL2	HCH1		RIM9	GIN4	RAX2	STE11	SAP9	CAG1	RBT5	SHE3	WSC2			STE3	GIN4	CCN1	CPP1	KIS1	PHR1	PHR1	CTR2	CPP1	INP51	PHR1	GPA2	C1_12530C_A	SHE3	C5_04120C_A	SAP6	FRP1	TSC11				PGA6	NAG1	NAG1	C5_03510C_A	C5_03510C_A	GPA2	IFF6
PHR1	PHR1	PKH2	TUS1	HGT8	PHO100	CLA4	FRP1			STE3	CPP1	HSP30	CR_06450W_A	RBT5	C3_03680W_A	IFF6	CEK1	BEM3			CST20	RAX2	FAR1	HST7	STE11	GPA2	GPA2	C2_02570W_A	HST7	SSU81	YHB1	STT4	FMP27	CAG1	CDC19	SAP5	MKC1					CCC1	PGA13	PGA13		SAP6	TUS1
GPA2	STE11	NIK1	GAC1	OPT4	SIT4					RAX2	HST7	PHR1	SSN3	CIP1	RGD1	RBE1	MKC1	CSA1			CCN1	CPP1	PTC1	CHT2	SSN3	STE11	STE11	PKH2	KIS1	SAP9	SSN3	C7_00840C_A	C6_02200C_A	SIT4	MNN22	MKC1	SPF1					ZRC1	PGA13	PGA13		C1_06660W_A	NMD5
INP51	CR_06450W_A	CHK1	CMK2	HET1	C3_00570C_A					ENA21	MNS1	GPA2	PTP3	RBT4	PEP12	HWP1	TUS1	C7_03480W_A			FAR1	HST7	GIN4	MNS1	DUN1	YHB1	YHB1	CCC1	GPA2	SIT4	FET31	SIT4	C1_11850W_A	C2_02440W_A	EXG2	SPF1	CSA1					C2_02570W_A	GAC1	GAC1		FRP1	SLD1
NAG1	SSN3	PDK2	C7_03480W_A	SPF1	C1_08860C_A					MNS1	KIS1	STE11	PCL5	RBE1	YEA4	YWP1	WSC2	CLA4			PTC1	CHT2	CPP1	GPA2	PTP3	INP51	INP51	C1_14200W_A	STE11	HWP1	PTC5	CSK1	IHD1	BEM3	SCW4	CSA1	ZRC1					RBT4	CEK2	CEK2		PCL5	HSL1
PTP3	STT4	CSK1	HCH1	FGR2	PTP1					HSP30	YHB1	PHO89	PKH2	CSA2	CEK1	EXG2	BEM3	C3_05420W_A			GIN4	MNS1	HST7	STE11	OCA6	NAG1	NAG1	CAG1	C4_02720C_A	CEK1	C5_04120C_A	CEK1	PRY1	CLA4	GAC1	ECE1						SAP5	CEK1	CEK1		C6_01870C_A	KEX2
FGR22	ECM4	CEK1	C1_05320C_A	ZRC1						PHR1	STE11	C4_02720C_A	PTC2	YWP1	KEX2	PGA6	C7_03480W_A				CPP1	KIS1	MNS1	YHB1	PTC5	SAP7	SAP7	RBT5	STE2	TUS1	CAG1	CMK2	C1_06140C_A	TSC11								YHB1	C1_06140C_A	C1_06140C_A		C1_11850W_A	CR_06450W_A
SAP7	DUN1	CEK2								GPA2	INP51	STT4	PTC7	SAP6	SPF1	CSA1	C3_05420W_A				C2_08920W_A	CTA9	KIS1	DUN1	PKH2	NIK1	NIK1	RBE1	PKH2	MKC1	PDK2	C1_03470C_A	PGA6	PEP12								C1_14200W_A	FET31	FET31		C4_04860W_A	DCK1
OCA6	PKH2	MKC1								STE11	RGA2	STE2	SIT4	SAP5	RIM13	PIR1					HST7	ALS1	PHR1	ECM4	PTC2	CDC19	PHO100	CSA2	SSU81	SPF1	RBT4	GAC1	PGA54									C5_03510C_A	ENA21	ENA21		SAP98	CCN1
PHO15	NIK1	CMK2								PHO89	ECM4	FET31	CEK1	PRY1	BEM3	ECE1					KIS1	PHR1	GPA2	FGR22	C7_00840C_A	PHO100	CHK1	RGD1	NIK1	WSC2	CEK1											CTA9		SAP5		WSC2	SSU81
PTC5	CDC19	PRR2								INP51	PTP3	CTR2	C1_04090C_A	LIP8	ZRC1						CTA9	GPA2	STE11	PKH2	PTC7	SHE3	RBT4	C6_01870C_A	CHK1	CMK2	MKC1											FMP27		EXG2		PIR1	OPY2
PTC2	MNN22	CLA4								C4_02720C_A	CTR2	C2_02570W_A	MKC1	PIR1	C1_05320C_A						ALS1	STE11	YHB1	SSU81	MNN22	CHK1	RBE1	PEP12	SAP9	PIR1	PRR2											YWP1		C1_05900W_A		CSA2	MSB2
C7_00840C_A	CHK1	C1_07640C_A								STT4	PTC5	SSU81	PIR1	ECE1							GPA2	YHB1	SSN3	PTC2	CHK1	SAP9	SIT4	YEA4	CAG1	C1_03470C_A	CLA4											C1_11430W_A		IHD1		C3_00570C_A	CEK1
PTC7	PDK2	C3_05420W_A								STE2	PKH2	CCC1	CLA4								STE11	INP51	STE2	NIK1	PDK2	RBT4	HWP1	HGT6	C3_03680W_A	TSC11	PTC2											WSC2		ALS1		GAP4
PHO100	MNT4	C1_03470C_A								FET31	PTC2	SRD1	C1_03470C_A								CR_06450W_A	RGA2	FET31	CDC19	MNT4	RBE1	PEP12	C2_02440W_A	SIT4	CSK1												CHT2		PHR1
SAP9	CSK1									FGR22	C5_04120C_A	CDC19									C4_02720C_A	STT4	PTP3	SHE3	C5_02400W_A	SIT4	CEK1	HGT8	RGD1													PKH2		LIP8
CAG1	CEK1									CTR2	CCC1	SAP9									SSN3	ECM4	C2_02570W_A	CHK1	SIT4	HWP1	KEX2	FRP1	CEK1													C3_00570C_A		HSP30
C5_02400W_A	CEK2									C2_02570W_A	CDC19	CAG1									RGA2	NAG1	PTC5	CIP1	CSK1	PEP12	SAP6	OPT4	TUS1															CHT2
SIT4	MKC1									SSU81	PTC7	RBT5									STE2	FGR22	SSU81	C3_03680W_A	CEK1	CEK1	SAP5	HET1	MKC1															GDE1
KEX2	CMK2									NIK1	CHK1	C6_01870C_A									DUN1	PCL5	C5_04120C_A	SIT4	C3_00570C_A	KEX2	LIP8	SPF1	WSC2															C1_11430W_A
C3_00570C_A	PRR2									CCC1	C1_14200W_A	RGD1									PTP3	SSU81	PTC2	RGD1	C1_04090C_A	YWP1	HET1	PIR1	BEM3															FAD3
C1_08860C_A	CLA4									SRD1	CAG1	HGT6									PCL5	NIK1	NIK1	CEK1	CEK2	SAP6	MKC1	FGR2	TSC11															PTP3
SAP6	CTN1									CDC19	PDK2	C3_00570C_A									PTC5	CCC1	CHK1	C3_00570C_A	MKC1	SAP5	SPF1	ZRC1	RGA2															RHB1
SAP5	C1_07640C_A									CHK1	C3_03680W_A	HGT8									PKH2	CDC19	CAG1	KEX2	SPF1	LIP8	RIM13	CLA4																LSC2
EXG2	C3_05420W_A									SAP9	LSC2	EXG2									SSU81	SHE3	PDK2	C2_09870W_A	PTP1	HET1	CLA4	C1_05320C_A																PHO100
LIP8	C1_03470C_A									C1_14200W_A	SIT4	OPT4									PTC2	CHK1	CIP1	FRP1	CMK2	MKC1	ECE1																	MSB2
SCW4										CAG1	RGD1	SPF1									C7_00840C_A	SAP9	RBT4	CEK2	PRR2	SPF1																		C7_03480W_A
SPF1										RBT5	C2_03760C_A	CSA1									NIK1	SIT4	SIT4	MKC1	CLA4	RIM13
RIM13										CIP1	PEP12										CDC19	RGD1	C6_01870C_A	GAC1	C1_07640C_A	CLA4
PTP1										C6_01870C_A	YEA4										CHK1	CEK1	CEK1	WSC2	C3_05420W_A	ECE1
SAP98										RGD1	CEK1										SAP9	C3_00570C_A	MKC1	CMK2	C1_03470C_A
										PEP12	KEX2										CAG1	KEX2	CMK2	FGR2
										HGT6	C1_04090C_A										C3_03680W_A	CEK2	PRR2	ZRC1
										YEA4	C2_02440W_A										SIT4	MKC1	ZRC1	CLA4
										KEX2	HET1										RGD1	RIM13	CLA4	TSC11
										C3_00570C_A	MKC1										CSK1	BEM3
										C2_02440W_A	SPF1										CEK1	PTP1
										HGT8	GAC1										C3_00570C_A	FGR2
										IHD1	RIM13										KEX2	ZRC1
										EXG2	BEM3										SAP6	C7_03480W_A
										C2_09870W_A	CMK2										C1_04090C_A	CLA4
										OPT4	ZRC1										C2_02440W_A	TSC11
										SPF1	C7_03480W_A										C2_09870W_A
										RIM13	CLA4										TUS1
										CSA1	CTN1										GAC1
										FGR2	C1_03470C_A										WSC2
										ZRC1	C1_05320C_A										RIM13
										CTN1											BEM3
										C1_03470C_A											PTP1
																					CMK2
																					C7_03480W_A
																					CLA4
																					C1_03470C_A
																					TSC11
																					MKC1
